# Supplementary material for: AutoTerm: A "big data" repository of Greenland glacier termini delineated using deep learning
Source: Copernicus journal article supplement (doi:10.5194/egusphere-2022-1095), 2022-11-04
Supplement: Supplementary file [file egusphere-2022-1095-AC1-supplement.pdf]

## General Comments

This paper presents an automated pipeline in Google Earth Engine for glacier terminus tracing together with a so-derived dataset and updated ice/ocean masks. Such a pipeline is highly needed and of great significance to the community. This extent of automation has not been reached in related works. We thank the authors for their valuable contribution!

While this paper employs a sound deep learning architecture in combination with a promising screening module, I have several major concerns, including the technical correctness of the evaluation protocol and, thus, the validity of the proposed study, as the generalizability of the deep learning network still needs to be proven. Furthermore, comparisons to other studies need to be conducted in a technically correct way, and the reproducibility of the study needs to be ensured by making the assembled training dataset publicly available. Lastly, the structure of the manuscript should be improved upon.

We greatly appreciate the detailed and thorough review by Reviewer 1. We have made our best effort to revise the manuscript based on the referee's comments and suggestions. Below is an item-by-item response to the specific comments by this reviewer.

### Major Concern 1: Evaluation Protocol

The pipeline has not been properly tested, and hence, we can not yet rely on its output. In my understanding, the authors seem to confuse uncertainty estimation with error assessment. In line 245, they call the calculation of the difference between prediction and ground truth „uncertainty quantification“. The authors then claim that comparing to manually picked traces „requires significant manual effort“ because it would have to be redone, as „network accuracy likely varies over time as glaciers experience different conditions“. Instead, the authors use two different uncertainty quantifications that do not rely on ground truth data. Calculating uncertainties is definitely useful, and the two used ways of calculating the effect of different sources of uncertainty (model inherent and input inherent) look very promising. However, calculating the uncertainty is no substitute for an error assessment. The authors themselves state in line 395: „if both duplicated traces are deviated from reality but are close to each other, the uncertainty would not represent the reality.“ It is, therefore, indispensable to calculate the deviation of the network's predictions to manually delineated ground truth traces on a test set that is independent of the train set. First, we need to know how well the network is performing at the moment before we apply it to new unseen data and afterward assess whether the network's performance degrades when new sensors are used or other conditions change (called domain shift in machine learning).

We agree with the reviewer that the difference between predictions and ground truth should be called “error”, while the difference between duplicate traces should be taken as “uncertainty”. We have identified places in the manuscript where this terminology may have been confused and have updated the text. In addition, we have performed a test of the network as follows. We randomly choose 100 traces from TermPicks as a test dataset and use the rest of the TermPicks data to train the network from scratch. After training the network, we apply it to a test dataset and quantify the deviation of the network's prediction to manual delineations in the test dataset. This reveals a test error of 79 meters, which is similar to previous authors (Mohajerani et al., 2019; Zhang et al., 2019; Baumhoer et al., 2019; Cheng et al., 2020). The description of this test is added to the manuscript in Line 214 and Line 316.

Quantifying error based on manual delineation involves a trade-off: the more representative the error is, the more manual effort it takes. Since we aim to produce as large a terminus dataset as possible (with a resulting 278,239 glacier termini), a highly representative error would require too much manual effort, which violates our primary objective to save manual effort. For this reason, we still keep the two automated ways to quantify the uncertainty of the terminus data. We agree that uncertainty and error are not the same.

Although the reviewer states that we cannot rely on our model output, even without the model test we have now performed, we believe our data to be reliable for the following reasons. First, our terminus traces match the remote sensing images (Fig. 4). Second, the time series of terminus variation are in agreement with both TermPicks and CALFIN (Fig. 5). Third, the time series of terminus variations show a clear seasonal signal (refer to the time series data described in section 4.4), which would not be revealed if our terminus traces are unreliable.

Additionally, an experiment should be conducted to determine whether and by how much the error between prediction and ground truth on the test set is reduced when the screening module is applied versus not applied. In this way, the effectiveness of the screening module can be demonstrated. The same holds for the upsampling of small images (it is not sufficient to visualize the results of one sample, as shown in Fig. 13).

The screening module belongs in post-processing, and is thus not related to network inference or training. Instead, the screening module is for detecting outliers in order to improve data quality. Fig. 3 and the red crosses in Fig. 5 demonstrate the effectiveness of our screening module. For these reasons, we did not see it necessary to validate the effectiveness of the screening module on a test set.

We agree with the reviewer that the test error is needed to demonstrate the effectiveness of upsampling as it is a pre-processing procedure. Thus, we have also conducted an upsampling test. For this test, we randomly select 36 images of five small glaciers to be a test set for size normalization. These images are not included in the training set for the independent evaluation of the size normalization's effectiveness. We add a new table to show the test error and uncertainty from duplicate traces with and without size normalization (Table S2). The results show that size normalization can effectively reduce test error and uncertainty. The related description is now added in Line 429.

### **Major Concern 2: Generalizability**

The pipeline has to be tested on out-of-sample data (i.e., glaciers not present in the training dataset) and data outside of Greenland to show generalizability to the global scope.

1. Line 451 „Owing to the transferability of deep learning, the entire pipeline has the potential to be applied to many other outlet glaciers around the world“
2. Line 135 „converting the TermPicks terminus data into a training dataset suitable for deep learning highly generalizes the network“

These claims have to be proven on such a test set. As most manually annotated traces available from related work are part of TermPicks and hence, have been used for training, another test set has to be used. For testing on SAR imagery, the dataset provided by Gourmelon et al. could, for example, be used, as it is not incorporated in TermPicks (except Jacobshaven, which probably has overlaps with TermPicks). However, test data for optical imagery might have to be created manually (e.g., from Antarctica or the Russian Arctic). At least, I am unaware of a dataset based on optical imagery that is not incorporated in TermPicks.

The importance of the size of training data in the deep learning field has been well demonstrated. For instance, Sun et al. (2017) showed that the network's performance increases logarithmically based on the volume of training data size. For this reason, we see no need to provide additional proof that our model has the ability to generalize. Further, our study focus is on Greenland alone – not on a global scale. We merely identify the potential for our model to be used at that scale. That said, out of interest we conducted an experiment in which we trained the network with only 1466 training examples prepared manually without including TermPicks. The test error of this network is 315 meters, which is much larger than 79 meters that we have after training with TermPicks. Such an improvement demonstrates the generalization improvements brought by TermPicks. The related description is added in Line 405.

### **Major Concern 3: Comparability**

It is not possible to compare the calculated uncertainties of this manuscript to the errors calculated in related works, as done in, e.g., line 304 or line 379. Two totally different metrics are compared here, and studies have been conducted on different datasets. For a valid comparison, the exact same network/pipeline needs to be tested on different datasets, or different networks/pipelines have to be trained, optimized, and tested on the exact same data (a so-called benchmark dataset). Altering both the dataset and the network/pipeline introduces too many changes, and a changed performance could result from either the different dataset (for example, the test set might be easier, and therefore, the performance of an otherwise worse performing network would be better on this test set) or the different network/pipeline.

Concludingly, the claimed improvements 1 and 2 (line 377 „1 increasing the generalization level of the deep learning network to enable more and better quality terminus predictions; 2 deploying size normalization to improve the accuracy of terminus delineation for small glaciers“) are not proven.

One way to show the superior terminus prediction performance on SAR imagery could be the use of the benchmark dataset recently proposed by Gourmelon et al. (2022) (i.e., retraining the pipeline on the train set and evaluating it on the test set using the stated metrics). To the best of our knowledge, there is no equivalent benchmark dataset for optical imagery.

Now that we have performed an error estimate we can more accurately compare our network error to that from other studies (Line 315), and find that our network’s performance is comparable with other studies, not superior or inferior.

We agree with the review that different networks should be trained and tested on the same benchmark dataset to determine the best. However, such a test is outside of the scope of this study. The objective of this study is not to demonstrate which deep learning network is better but to generate a terminus dataset with spatial coverage and temporal resolution that no prior study has with the addition of further automation in the production pipeline.

For generalization and size normalization, please refer to the response of Major Concern 3 and Major Concern 1, respectively.

#### **Major Concern 4: Reproducibility**

Please make your complete assembled training data (including the satellite imagery) publicly available, as only in this way the reproducibility of the results is guaranteed. Moreover, please also provide the manually created reference polygons for each glacier.

All our remote sensing images are freely available on Google Earth Engine. The code for collecting the data is also available on GitHub. TermPicks is also a publicly available dataset. The reference polygons and label polygons converted from TermPicks traces have been included in the AutoTerm dataset now (10.5281/zenodo.7527485).

#### **Major Concern 5: Structure of the manuscript**

The structure of the manuscript has to be improved upon. There is a mix-up between the training and inference of the pipeline, and some information is given twice at different positions in the manuscript. It is hard to tell when the authors write about the newly derived dataset in contrast to the dataset derived from TermPicks for training the network, e.g., in line 295 („We find an average success rate of 64%“), it is unclear on which dataset the success rate was calculated. I would suggest splitting the manuscript into two main parts as follows, but there could also be another better split-up:

1. Training Pipeline: manual delineated dataset creation (TermPicks + additional manual annotations), neural network (architecture), network training (train-validation-test split, learning rate, number of trained epochs, etc.), screening module, error calculation, uncertainty estimation
2. Inference Pipeline: new data acquisition + pre-processing, uncertainty estimation on this newly derived dataset, ice/ocean mask updates

We thank the reviewer for these comments. We decided to structure the manuscript following the order of data processing. We first collect remote sensing images and conduct preprocessing (section 3.1). Second, we generate the training dataset by converting the terminus traces in TermPicks into label polygons and pairing polygons with the remote sensing images. Third, we introduce the network structure and the training progress in section 3.3. Sections 3.4 to 3.7 are post-processing procedures after applying the well-trained network to make inferences on the 433,721 images collected via Google Earth Engine. That said, we notice that the original section titles may have caused some confusion. Thus, to address this comment we changed the title of Section 3.2 from “Generalizing the network” to “Generating training data from TermPicks”, and the title of Section 3.3 from “Deep Learning Network” to “The Structure and Training of Deep Learning Network”.

Furthermore, we have revised some of the text to make it clearer that we first perform network training and then we apply the well-trained network to all the images collected through Google Earth Engine to generate terminus positions. This is done in the last sentence in Section 3.3 as “*After the training, we apply the well-trained network to the test set for quantifying the test error and to all the images collected via GEE for generating the terminus dataset.*” Line 217.

The success rate is the percentage of terminus traces that pass the screen module. We add one sentence at the end of section 3.4: “*Finally, we estimate the success rate by calculating the percentage of the terminus traces that pass the screening module.*” Line 255.

In section 4.1, the authors first introduce the ‘success rate’, which should, however, be introduced in the methods section.

We add one sentence at the end of section 3.4: “*Finally, we estimate the success rate by calculating the percentage of the terminus traces that pass the screening module.*” Line 255.

Moreover, paragraph line 188 to 195 should be moved to limitations.

Line 194 to 201 describe the limitations of the input imagery, not the limitations of our work. These points are discussed here because they explain why we needed to prepare additional training data. Therefore, we think this text fits better in Section 3.2, which describes the training data preparation.

An explanation of the two uncertainty measures, as given in lines 319 to 323, should be moved to further at the beginning of the manuscript.

The principle of the two uncertainty measures is described fully in Methods (Section 3.6). Lines 344 to 355 explains the uncertainty results and focus on why these two uncertainties are different. Therefore, we believe lines 344 to 355 fit better in the Results section.

### **Major Comments:**

1. It is unclear to me whether the name „AutoTerm“ refers to the automated pipeline or the derived dataset, or both.

We thank the reviewer for pointing this out. We think it is a good idea to use AutoTerm reflect both the data and pipeline. We have changed the title of the manuscript to: “AutoTerm: an automated pipeline for glacier terminus extraction using machine learning and a “big data” repository of Greenland glacier termini.”

2. The title of the manuscript does not mention the automated pipeline, which is, in my humble regard, the most significant contribution. Hence, I’d argue for a more suitable title, e.g. AutoTerm: an automated Google Earth Engine pipeline for glacier terminus extraction and „big data“ repository of Greenland glacier termini

We thank the reviewer’s suggestion. We have changed the title of the manuscript to: “AutoTerm: an automated pipeline for glacier terminus extraction using machine learning and a “big data” repository of Greenland glacier termini.”

3. It needs to be clarified whether the region of interest that has to be defined for each new glacier has to be a polygon like in figure 2 or whether it can simply be a bounding box.

Each region of interest is a bounding box. The polygon in Figure 2 is a reference polygon only for converting TermPicks traces into a training label polygon, which is described in the Figure caption. We have updated the text where needed to clarify this point. Line 146.

4. Line 163 onwards: „This allows glaciers with various natural sizes to have a similar image size in computer vision, which largely decreases the complexity of delineating glacier terminus.“ This statement (the second part of it) needs more explanation or a reference.

We rephrased the text here and added a reference: “*We then normalize the image size, which is commonly adopted in the computer vision field for better capturing object features with various physical sizes (Xu et al., 2017).*” Line 167.

5. The normalization of image sizes is not clear to me. Small images are upsampled, but large images are not downsampled. Hence, do they still have different sizes? I would not call this normalization, then. Moreover, the authors extract patches afterward, so the input size is always equal anyways. Additionally, only showing one figure that shows an improvement for one trace is not sufficient evidence that this upsampling generally improves the delineation performance. Please show the improvement in numbers over a complete, independent test set (refer to major concerns 1 and 2).

Different glaciers are not of the same physical size and therefore don’t have similar number of pixels that fall within their fjord walls. This can vary from 300 pixels to 3000 pixels. As a result, the deep learning input (image patch) may sometimes cover more than the entire glacier and may alternatively sometimes only cover a part of a glacier.

After normalization, all small glaciers will be covered by images with a width of about 1000 pixels, regardless of their original image width. In other words, the normalization makes glaciers appear to the deep learning network as if they had a similar physical size. We have attempted to clarify this in the text. Line 168.

We agree with the reviewer that test error is needed to demonstrate the effectiveness of upsampling as it is a pre-processing procedure. We randomly select 36 images of five small glaciers that are beyond the training set as the test set for size normalization. We add a new table to show the test error and uncertainty from duplicate traces with and without size normalization (Table S2). The results show that size normalization can effectively reduce test error and uncertainty. The related description is now added in Line 428.

6. Section 3.3:

1. „encoder-decoder structure [...] can obtain sharp object boundaries“: Actually, an encoder-decoder structure without skip connections would most probably not recover any details and, therefore, no sharp object boundaries. In Chen et al. (2018), they use a more sophisticated method to obtain the sharp boundaries: „A fully connected CRF [conditional random field] is then applied to refine the segmentation result and better capture the object boundaries.“

We realize that there is a mistake in our citation. The original DeepLab use the CRF to refine the segmentation results (Chen et al., 2018a, DeepLab: Semantic Image Segmentation with Deep Convolutional Nets, Atrous Convolution and Fully Connected CRFs). Later on, the same author improved the DeepLab and developed DeepLabV3+ (Chen et al., 2018b; Encoder-Decoder with Atrous Separable Convolution for Semantic Image Segmentation), which is the network we use in this manuscript. The DeepLabV3+ adds a simple yet effective decoder module to refine the segmentation results especially along object boundaries (Chen et al., 2018b).

2. „atrous convolution [...] senses multi-scale contextual information“: It is not the atrous convolutions alone that make recognition of multi-scale contextual information possible, but the combination of atrous convolutions in ASPP. "Atrous convolution allows us to explicitly control the resolution at which feature responses are computed within Deep Convolutional Neural Networks. It also allows us to effectively enlarge the field of view of filters to incorporate larger context without increasing the number of parameters or the amount of computation. Second, we propose atrous spatial pyramid pooling (ASPP) to robustly segment objects at multiple scales." (Chen et al., 2018)

We thank the reviewer’s comments and changed “atrous convolution” to “atrous spatial pyramid pooling”.

3. „multi-scale contextual information [...] [is] helpful for our task since [...] we integrate remote sensing datasets with different spatial resolutions“: Multi-scale refers to how many pixels a neuron is able to see (effective receptive field) and not how much square meters one pixel can see. Hence, multi-scale contextual information helps when the calving front covers many versus only a few pixels. Thus, it helps only indirectly with different spatial resolutions of the dataset.

We agree with the reviewer’s comment. Multi-scale refers to the network’s ability to sense various portions of the images but not sense images with different resolutions. We rephrase the sentence as *”Sharp boundaries can improve delineation accuracy, and sensing multi-scale information helps indirectly when we integrate remote sensing datasets with different spatial resolutions.”* Line 205

4. „This network has been proven to have large learning capability, spatial transferability [...]“: These are quite big claims based on a train set of two glaciers and a test set of one glacier that are all located in Greenland (Zhang et al., 2021).

The large learning capability has been demonstrated by the paper of DeepLabV3+ (Chen et al., 2018b). Zhang et al. (2021) applied the network to a glacier beyond the training set, showing the network's spatial transferability. In this work, we apply the network to 295 glaciers in Greenland and generate 278,239 glacier termini, of which 17,906 terminus traces are from the

training set. This means that 94% of our results are beyond the training set, which further demonstrates the learning capability and spatial transferability of the network.

5. „The network is trained with a learning rate of 0.005 [...] as recommended by (Zhang et al., 2021)“: The optimal learning rate for training is highly dependent on the dataset as well as on the batch size (not just the model). Hence, the learning rate has to be treated as a hyperparameter, which has to be optimized on a validation set (not the test set). A sub-optimal learning rate can lead to significantly longer training times until convergence or no convergence at all.

We agree with the reviewer and have tried to train the network with learning rates of  $5 \times 10^{-3}$ ,  $2 \times 10^{-3}$ , and  $1 \times 10^{-3}$ . The validation losses for these three learning rates are 0.023, 0.020, and 0.024, respectively. Overall, the validation losses are measured using binary cross entropy and are similar to each other. We chose the learning rate ( $2 \times 10^{-3}$ ) with the lowest validation error. We rephrased the sentence as: “*Based on the learning rate in Chen et al. (2018b) and Zhang et al. (2021), we train the network with learning rates of  $5 \times 10^{-3}$ ,  $2 \times 10^{-3}$ , and  $1 \times 10^{-3}$ , and choose  $2 \times 10^{-3}$  owing to its lowest validation loss.*” Line 210.

6. „we choose the largest batch size (16)“: This should be „largest possible batch size (16) on an A100 GPU with 40/80 GB GPU memory“. Please specify whether your A100s have 40 or 80 GB GPU memory.

The sentence is rephrased as follows: “*we choose the largest possible batch size (16) on four A100 GPUs with 160 GB GPU memory in total. We set the batch size to a power of two to take full advantage of GPU processing (Kandel and Castelli, 2020)*” Line 212.

7. What exactly is meant by "maximize our computational power" in line 204?

It means using as much GPU memory as possible. The sentence is now rephrased as “*we choose the largest possible batch size (16) on four A100 GPUs with 160 GB GPU memory in total.*” Line 212.

8. „The network training takes about a week“: This is quite long and might be due to a sub-optimal learning rate. Please specify not only the training time but also the number of trained iterations over the complete augmented dataset. Also, specify your train-test-split and your metrics for evaluation (refer to major concern 1). Moreover, did you use an early stopping criterion? You might have overfitted during this long training time.

The long training time is caused by the large training dataset. We have 17906 training examples, and the augmentation increases the training set by a factor of four. The training takes more than 600,000 iterations. Among all the training data, we select 5% of images randomly as validation datasets to conduct early stopping. The training will be stopped when the validation error stops decreasing for 3 consecutive epochs. We add these details in Line 214.

7. Line 210 „do not have any quality control“: At least Cheng et al. have manual control. So, maybe rephrase it to „do not have any automated quality control“.

We thank the reviewer for pointing that out. Cheng et al. (2021) have an automated data screening based on the deviations of two classifications of the network.

We have changed the related text as: “*Many previous DL methods applied to terminus delineation do not have quality control (Mohajerani et al., 2019; Zhang et al., 2019). Where it does exist, data*

*screening has been simplistic and not automatically applied. For example, Zhang et al. (2021) only considers the complexity of the terminus shape and removes traces with abnormal complexity (which, in turn, requires a threshold to be established for each glacier), Baumhoer et al. (2019) only considers outliers that arise in a time series of terminus position change over time, and Gourmelon et al. (2022) remove the outliers based on terminus length. Cheng et al. (2021) however did design an automated data screening based on the deviation of two classifications from the network. Our screening module is based on using the physical properties of glacier termini.”* Line 224.

8. Line 215 onwards: Please mention that the screening builds on top of existing works here (Zhang et al. 2021 – terminus curvature screening, Baumhoer et al. 2019 – time series outliers, Gourmelon et al. 2022 – removal of too short termini predictions), but goes one step further, i.e., doesn't use any manual intervention or prior knowledge of the data.

The related sentences are revised as follows: *“Based on the previous works (Baumhoer et al. 2019 , Zhang et al. 2021, Gourmelon et al. 2022), we develop an automated screening module that forgoes any manual intervention or prior knowledge of the data.”* Line 232.

9. Line 217 „Terminus length is determined by the sum of the piece-wise length along an individual terminus trace“. Please explain in more detail. This, at least for me, is hard to understand.

Each terminus trace is an ordered set of points. The length is the sum of the length between the two closest points. The description refers to how we calculate the terminus length, which might be confusing to readers. Terminus length is just the physical length of the glacier terminus. As a result of this confusion, we decided to remove this sentence.

10. Line 218 „Terminus curvature is computed between two adjacent points for each point along the terminus and then an average is taken for each terminus trace.“ This is also not completely clear to me. I think an equation would help.

We have rephrased the related text as: *“Terminus curvature is computed among every three adjacent points along the terminus based on Peijin Zhang’s work (<https://github.com/peijin94/PJCurvature>), and then an average is taken for each terminus traces.”* Line 235.

11. Line 224 „percentile of the data range“: Do you refer to the data range of the generated training data? Is this computed per glacier? Per satellite? The validity of these thresholds needs to be checked on an independent test set (refer to major concerns 1 and 2).

For each glacier, we will calculate the thresholds based on the termini from the same satellite. For instance, we will calculate thresholds for Sentinel-2 traces of GID2 and Landsat-8 traces of GID2 separately. We add one sentence in Line 242 to provide additional clarification: *“The thresholds are calculated automatically based on the results of the same glacier and same satellite.”*

The screening module belongs to the post-processing, which is not related to network inference or training. The screening module is for detecting outliers and maintaining the data quality. Fig. 3 and the red crosses in Fig. 5 demonstrate the effectiveness of our screening module. So, we did not validate the effectiveness of the screening module on a test set.

12. Line 227 „For outliers in terminus length, we remove both the lower and upper thresholds (Eqns. 1 and 2) because we do not anticipate large changes in terminus length in either direction (bigger or smaller).“ As far as I understood, these thresholds were calculated on data for Greenland. Hence, the optimal thresholds for, e.g., Antarctica, might completely deviate from the ones calculated for



Greenland. This might hinder the global applicability of the pipeline (refer to major concerns 1 and 2). This should be added to the limitations.

We agree with the reviewer that these thresholds differ for Greenland and Antarctica glaciers. They are different among glaciers in Greenland. However, these thresholds are determined **automatically** based on the distribution of termini from each satellite and each glacier. Therefore, we believe it is feasible to apply the method globally. We have clarified this in the text. Line 242.

13. Line 235 „We then repeat this screening procedure ten times to maintain the quality of the terminus product“: What screening procedure is meant here exactly now? All three or just the one with large areas? And does the outcome change when the screening procedure is done several times? If yes, please explain why.

The pipeline of the screening module is shown in Figure 3. For the first time, the inter-quartile range quantifies thresholds based on the distribution of terminus features such as length, and we remove the outlier traces. Such removal changes the distribution of terminus features, and we will have new thresholds for the second time and detect new outliers. We keep doing this ten times or until we don't find any more outliers. We have clarified this in the text. Line 254.

14. Line 245 „Traditional uncertainty quantification for glacier terminus position is conducted by calculating the difference between manually picked termini and automatically-picked termini.“ This is not uncertainty quantification but an error assessment (see major concerns 1).

We agree with the reviewer's comments and have revised the related sentence. See our response to major concern 1.

15. Line 262 „instead of quantifying the uncertainties of terminus traces, [Hartmann et al.] use the multiple inferences of MC dropout as extra information to retrain the network. “ This is not quite correct. Hartmann et al. use the model uncertainty on one specific input as additional information for a second network with dropout. This second network then outputs several predictions again from which uncertainties could be calculated - but instead, to make it more robust, the predictions are averaged to eliminate this uncertainty.

We thank the reviewer's comments and rephrase the sentence as “*Hartmann et al. (2021) applied MC dropout to glacier terminus delineation and built a two-stage approach. They used the uncertainty of the first network as additional information to train the second network. The multiple outputs of the second network are averaged to eliminate the uncertainty and get the final prediction.*” Line 283.

16. Line 267 „To strike a balance between computational cost and the reliability of the MC dropout, we randomly chose ten images from all the sensors and make three inferences for each of them“: It is not quite clear to me. Are ten images of each sensor taken? „in total each glacier will have two measures of uncertainty“ – So, also ten images of each glacier?

Our original description is somewhat misleading. For each glacier, we will randomly select ten images for each sensor, and we will have 50 images in total. Using the ten images from the same sensor, we conduct MC dropout to quantify one uncertainty for that sensor. We have two measures of uncertainty, one is from duplicate traces, and the other is from MC dropout. The ten images from the same sensor are only for quantifying MC dropout uncertainty. We rephrase the text as “*To strike a balance between computational cost and the reliability of the MC dropout, we randomly chose ten images from each of the five sensors and made three inferences for each of the images. Thus, in total, each glacier will have six measures of uncertainty: one from duplicate traces and the other five estimated by MC dropout for each sensor.*” Line 289.

17. The results do, at some points, not validate the conclusions. No correlation was calculated (or it was not stated in the manuscript), and even a correlation would not necessarily induce causality. Please rephrase the conclusions to hypotheses.

1. Line 307 „glaciers with less training data will have larger uncertainties and lower success rates“

Rephrased as “*glaciers with less training data will probably have larger uncertainties and lower success rates*” Line 331.

2. Line 309 „since they have the highest spatial resolution“

Rephrased as “*Among the five datasets used, Landsat-8 and Sentinel-2 have the lowest average uncertainties, probably because they have the highest spatial resolution.*” Line 333.

3. Line 310 onwards „The reasons for the Landsat-5 uncertainty are twofold [...]“

Rephrased as: “*The reasons for the Landsat-5 uncertainty might be twofold.*” Line 335.

4. Line 314 „The higher uncertainty of Sentinel-1 images is due to its low image quality, coarse resolution, and the lower volume of training data derived from this sensor.“

Rephrased as “*The higher uncertainty of Sentinel-1 images could be due to its low image quality, coarse resolution, and the lower volume of training data derived from this sensor.*” Line 338.

18. Line 325 „the uncertainty from duplicate traces is more representative of Landsat-7 and Sentinel-2 than other datasets“ - Is it not only representative of these two datasets, as it was only calculated for these?

For each glacier, we average the uncertainties from all duplicated traces and use the mean to represent the uncertainty of that glacier. Each glacier has one value of uncertainty from duplicate traces, and that value is more representative of Landsat-8 and Sentinel-2 as the value comes from these two satellites. We have added two sentences to make the description clear:

Line 274: “*For each glacier, we average the uncertainties from all duplicated traces and use the mean to represent the uncertainty of that glacier.*”

Line 291: “*Thus, in total, each glacier will have six measures of uncertainty: one from duplicate traces and the other five estimated by MC dropout for each sensor.*”

19. Line 308 „Among the five datasets used, Landsat-8 and Sentinel-2 have the lowest average uncertainties“: Please give the exact numbers here. A table showing the different values for different data subsets would be good.

The numbers are shown in Figure 8. The missing information is now added to the figure caption.

20. Line 355 „The metadata contains the date in YYYY-MM-DD, Glacier ID, source image satellite, and the uncertainty of each trace by averaging the two types of uncertainties provided“: I thought the uncertainties were not available for every single trace, as they were only calculated for some of them due to computational limitations? Please clarify.

Each glacier has six measures of uncertainty: one from duplicate traces and the other five estimated by MC dropout for each sensor. The uncertainty of each trace is estimated by averaging the uncertainty

from duplicate traces and the MC dropout uncertainty of its satellite sensor. We added one sentence to clarify in Line 291: “*Thus, in total, each glacier will have six measures of uncertainty: one from duplicate traces and the other five estimated by MC dropout for each sensor.*”

Line 423: „additional training data will be required to improve the data quality“: or an improved network/pipeline.

Revised as suggested.

21. Line 434: „The pipeline can alert us of its failure based on the success rate within the screening module.“: With your limitation that the screening module might not provide valid results for glaciers with few training examples, this alert might not trigger.

When most of the results are of good quality, the terminus features, such as length, will have a Gaussian-like distribution, where most of the terminus lengths are within the thresholds determined by the screening module, and the success rate will be high. For glaciers with few training examples, their results might be of poor quality. In that case, the distribution of the terminus features will be relatively scattered because many terminus lengths could be unreasonably long or short. As a result, the screening module will detect many traces as outliers, and these glaciers will have a low success rate, which can be used as an alert. We have clarified the text to point this out more readily: ” *The network's failure will result in many termini not passing the screening. The pipeline can use the low success rates to alert us to prepare more training data for the corresponding glaciers.*” Line 464.

22. Please revise the color scheme of your figures, as red and green should not appear in the same plot (<https://www.the-cryosphere.net/submission.html#figurestable>).

Thank you for bringing this to our attention. We have modified the color schemes of Figure 6, Figure 8, and Figure 11, and checked figures through <https://www.color-blindness.com/coblis-color-blindness-simulator/>.

23. Figure 9: Is the number on the bottom left the average? Moreover, it would be good to state between which sensors the duplicates were calculated in the description of the figure.

Yes. We have added the missing information in the figure captions.

24. Figure S5: Visually, this does not appear to be a linear relationship. Have you done a correlation test?

Yes, the uncertainties from duplicate traces and MC dropout do not show a linear relationship. The differences in the two types of uncertainties are caused by their quantification methods and source images. We explained the details of the differences in the last paragraph of section 4.1, Data Quality.

### Specific Comments:

1. Line 56 onwards: Heidler et al. 2022 (Deep Active Contour Models for Delineating Glacier Calving Fronts), Loebel et al. 2022 (Extracting glacier calving fronts by deep learning: the benefit of multi-spectral, topographic and textural input features), Gourmelon et al. 2022 (Calving fronts and where to find them: a benchmark dataset and methodology for automatic glacier calving front extraction from synthetic aperture radar imagery), and Davari et al. 2022 (Pixelwise Distance Regression for Glacier Calving Front Detection and Segmentation) are missing.

We thank the reviewer's comments, and all the missing citations are included.

2. Line 188: „Although TermPicks covers a range of conditions and brings great diversity to the training set, additional training data would improve the accuracy of the network in difficult situations.“ Please rephrase more cautiously (e.g., „... would presumably improve ...“), as you have no hard evidence that further training data would really improve the accuracy in this situation.

The sentence is revised as suggested.

3. Line 205: GPU -> GPUs

Revised as suggested.

4. Line 220 „With these three metrics, we calculate the lower (TL) and upper thresholds (TU) for each based on the inter-quartile range:“ - The sentence structure is hard to follow. So, you compute the thresholds for each individual criterion?

Yes. The sentence is rephrased as *“For each of the three metrics, we calculate the lower (TL) and upper thresholds (TU) based on the inter-quartile range:”*

5. Line 417 „120 GB of GPU memory“: I guess you mean 120GB RAM? There are only a 40GB and an 80GB A100 version as far as I know, and 4 (=number of GPUs) times 40 GB is already 160 GB.

I mean 120 GB of GPU memory. We have four A100 GPUs with a total memory of 160 GB, and we use 120 GB of memory. We didn't use all the GPU memory since we wanted the batch size to be a power of 2. When setting the batch size to 16, our network will need 120 GB of GPU memory.

6. Line 444: Remove the word „fully“, as you still have some manual steps like defining the region of interest.

The region of interest is only manually defined once at the beginning, and it won't interrupt the pipeline for continuous producing termini. Also, the region of interest will be **automatically** defined by the intersection between the terminus and the flowline in the future. So, we still think our pipeline is fully automated.

7. Table 1 includes abbreviations that were not introduced.

The information in the last column is not necessary so it was removed.

8. Figure S2: Please name the conditions in the figure's description as well, referencing (a) to (e).

The names of the conditions are included in the figure caption.

## Reference

Baumhoer, C. A., Dietz, A. J., Kneisel, C., and Kuenzer, C.: Automated Extraction of Antarctic Glacier and Ice Shelf Fronts from Sentinel-1 Imagery Using Deep Learning, *Remote Sensing*, 11, 2529 – 22, <https://doi.org/10.3390/rs11212529>, 2019.

L. -C. Chen, G. Papandreou, I. Kokkinos, K. Murphy and A. L. Yuille, "DeepLab: Semantic Image Segmentation with Deep Convolutional Nets, Atrous Convolution, and Fully Connected CRFs," in IEEE Transactions on Pattern Analysis and Machine Intelligence, vol. 40, no. 4, pp. 834-848, 1 April 2018a, doi: 10.1109/TPAMI.2017.2699184.

Chen, L.-C., Zhu, Y., Papandreou, G., Schroff, F., and Adam, H.: Encoder-Decoder with Atrous Separable Convolution for Semantic Image Segmentation, in: Proceedings of the European Conference on Computer Vision (ECCV), 2018b.

Cheng, D., Hayes, W., Larour, E. Y., Mohajerani, Y., Wood, M. H., Velicogna, I., and Rignot, E. J.: Calving Front Machine (CALFIN): Glacial Termini Dataset and Automated Deep Learning Extraction Method for Greenland, 1972-2019, The Cryosphere, 2020, 1 – 17, <https://doi.org/10.5194/tc-2020-231>, 2020.

Gal, Y. and Ghahramani, Z.: Dropout as a Bayesian Approximation: Representing Model Uncertainty in Deep Learning, Proceedings of the 33rd International Conference on Machine Learning, 48, 2016.

Gourmelon, N., Seehaus, T., Braun, M., Maier, A., and Christlein, V.: Calving fronts and where to find them: a benchmark dataset and methodology for automatic glacier calving front extraction from synthetic aperture radar imagery, Earth System Science Data, 14, 4287–4313, <https://doi.org/10.5194/essd-14-4287-2022>, 2022.

Hartmann, A., Davari, A., Seehaus, T., Braun, M., Maier, A., and Christlein, V.: Bayesian U-Net for Segmenting Glaciers in Sar Imagery, 2021 IEEE International Geoscience and Remote Sensing Symposium IGARSS, 00, 3479–3482, <https://doi.org/10.1109/igarss47720.2021.9554292>, 2021

Kandel, I., & Castelli, M. (2020). The effect of batch size on the generalizability of the convolutional neural networks on a histopathology dataset. *ICT express*, 6(4), 312-315.

Mohajerani, Y., Wood, M. H., Velicogna, I., and Rignot, E. J.: Detection of Glacier Calving Margins with Convolutional Neural Networks: A Case Study, *Remote Sensing*, 11, 74 – 13, <https://doi.org/10.3390/rs11010074>, 2019.

Sun, C., Shrivastava, A., Singh, S., & Gupta, A. (2017). Revisiting unreasonable effectiveness of data in deep learning era. In Proceedings of the IEEE international conference on computer vision (pp. 843-852).

Xu M, Papageorgiou DP, Abidi SZ, Dao M, Zhao H, Karniadakis GE. A deep convolutional neural network for classification of red blood cells in sickle cell anemia. *PLoS computational biology*. 2017 Oct 19;13(10):e1005746.

Zhang, E., Liu, L., and Huang, L.: Automatically delineating the calving front of Jakobshavn Isbræ from multitemporal TerraSAR-X images: a deep learning approach, *The Cryosphere*, 13, 1729 – 1741, <https://doi.org/10.5194/tc-13-1729-2019>, 2019.

Zhang, E., Liu, L., Huang, L., and Ng, K. S.: An automated, generalized, deep-learning-based method for delineating the calving fronts of Greenland glaciers from multi-sensor remote sensing imagery, *Remote Sensing of Environment*, 254, 112 265, <https://doi.org/10.1016/j.rse.2020.112265>, 2021.
